# Supplementary material for: A transparent and adhesive carboxymethyl cellulose/polypyrrole hydrogel electrode for flexible supercapacitors
Source: Royal Society of Chemistry journal article supplement (doi:10.1039/d0tc01039a), 2020-01-01
Supplement: d0tc01039a1.pdf [file d0tc01039a1.pdf]

## **Transparent and adhesive carboxymethyl cellulose/polypyrrole hydrogel electrode for flexible supercapacitor**

Ya Cheng, Xiuyan Ren, Lijie Duan\*, Guanghui Gao\*

Polymeric and Soft Materials Laboratory, School of Chemistry and Life Science and  
Advanced Institute of Materials Science, Changchun University of Technology,  
Changchun 130012, P. R. China

Corresponding to Lijie Duan; Guanghui Gao

Tel: +81-431-85717352

Fax: +81-431-85716465

E-mail: [duanlijie@ccut.edu.cn](mailto:duanlijie@ccut.edu.cn); [ghgao@ccut.edu.cn](mailto:ghgao@ccut.edu.cn)

### KPS induced aggregation state change of CMC/PPy fibers

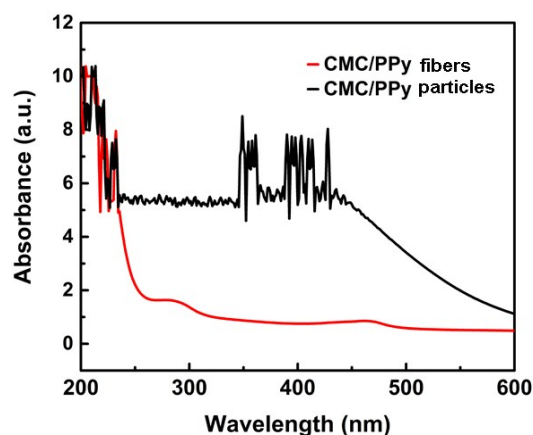

**Fig. S1** The UV-Vis absorption spectra of CMC/PPy fibers and uniformly distributed CMC/PPy particles after processed with KPS.

In order to investigate the unique visible light transmission and ultraviolet (UV) shielding optical characteristics to PPy hydrogel electrode, the CMC/PPy fibers and the CMC/PPy particles were analyzed. The KPS (5 mg) was directly added in the CMC/PPy fibers (PPy of 1.0 vol%) aqueous solution to prepare the uniformly distributed CMC/PPy particles. As illustrated in **Fig. S1**, the uniformly distributed CMC/PPy particles with small size possessed the excellent absorption performance in UV region.

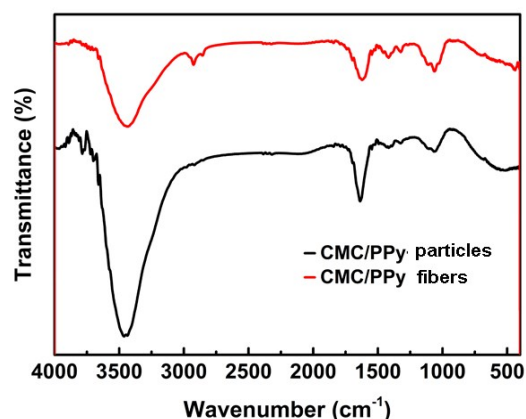

**Fig. S2** The FTIR spectra of CMC/PPy fibers and uniformly distributed CMC/PPy particles after processed with KPS.

Before the FTIR analysis, the CMC/PPy fibers and CMC/PPy particles solution after incubation with KPS were freezing-dried. As illustrated in **Fig. S2**, compared with CMC/PPy fibers, the chemical structure of CMC/PPy particles after processed with KPS was not different. During the incubation process, only the aggregate state of CMC/PPy fibers changed, and the structure did not change.

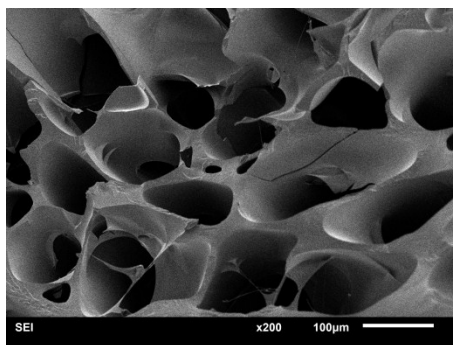

**Fig. S3** The SEM photography of dehydrated PAAm/CMC/PPy hydrogel.

After in-situ formation of CMC/PPy particles, the dehydrated PAAm/CMC/PPy hydrogel was observed by the SEM. In **Fig. S3**, the CMC/PPy particles owned a good affinity for the network inside the hydrogel, which combined with polymer network to fabricate the conductive pathway and improve conductivity. And the interconnected porous structure of PAAm/CMC/PPy hydrogel was observed.

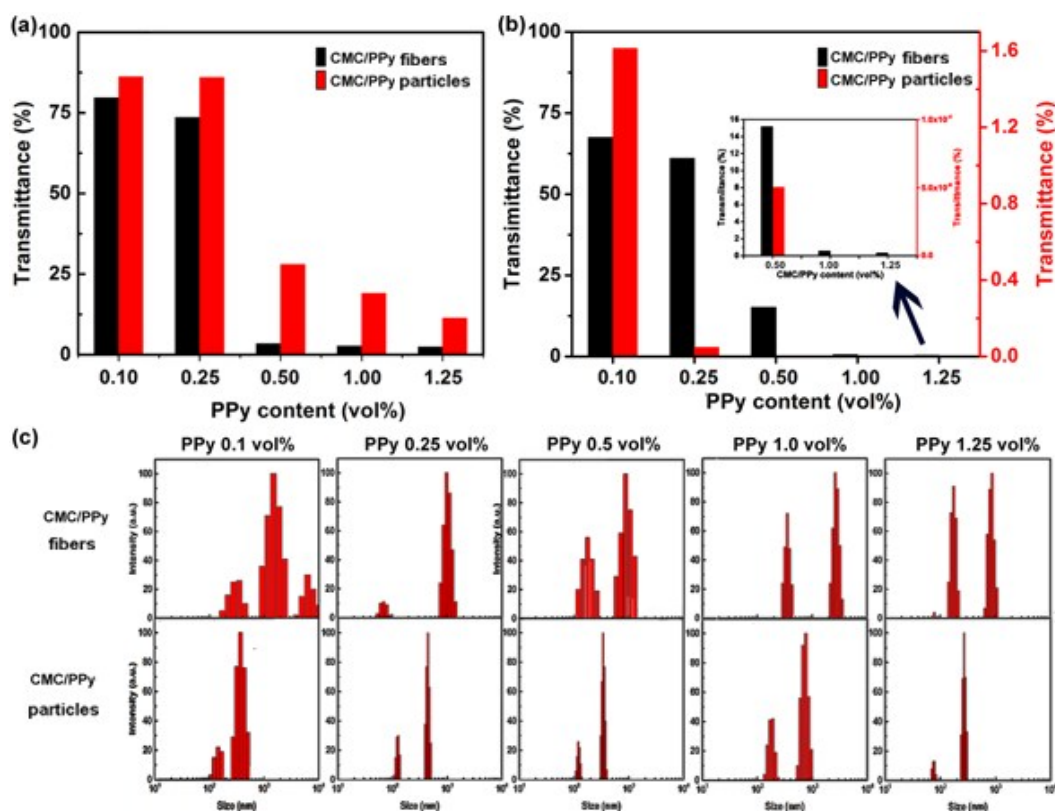

**Fig. S4** Transmittances of CMC/PPy fibers and CMC/PPy particles after processed with KPS at (a) 660 nm and (b) 365 nm; (c) DLS of CMC/PPy fibers and CMC/PPy particles with the various PPy contents

The unique visible light transmission and ultraviolet (UV) shielding optical characteristics of PPy hydrogel were deprived from the in-situ formed uniformly distributed CMC/PPy inside the hydrogel. The optical performance of CMC/PPy fibers and CMC/PPy were analyzed by UV-Vis absorption spectra. As shown in **Fig. S4a and b**, the UV-shielding behavior of uniformly distributed CMC/PPy particles was excellent obvious. Moreover, the sizes of CMC/PPy fibers and CMC/PPy particles with various PPy contents were quantitatively analyzed by DLS. In **Fig. S4c**, the particle sizes of CMC/PPy particles changed smaller and size was lower than 660

nm. Therefore, the PAAm/CMC/PPy hydrogel possessed the visible transparency.

### The dynamic mechanical property of PAAm/CMC/PPy hydrogel

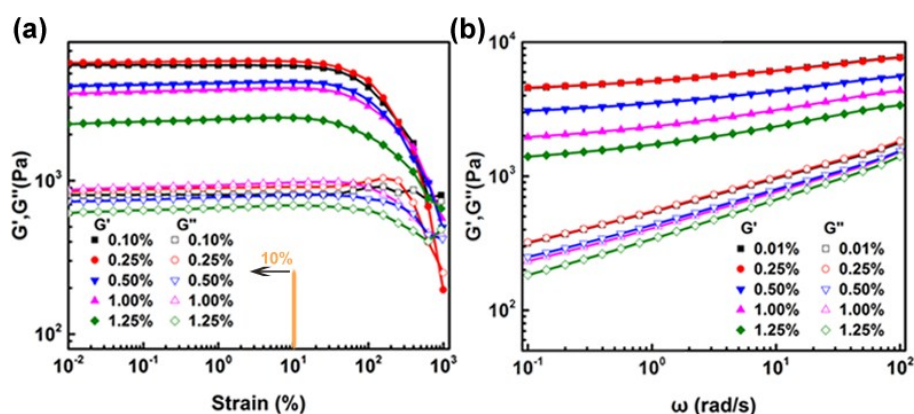

**Fig. S5** The a) amplitude sweep and b) frequency sweep curves of PAAm/CMC/PPy hydrogel with various PPy contents.

The dynamic mechanical properties of hydrogel were researched by rheological measurements. In **Fig. S5a**, there existed a negligible weak strain overshoot phenomenon for PAAm/CMC/PPy hydrogel which derived from H-bonds. According to strain sweep curves, the linear region was determined as the strain of 10%, which did not depend on strain. Then, the dynamic gel network relaxation property was analyzed by frequency sweep measurements in **Fig. S5b**. The storage modulus ( $G'$ ) and loss modulus ( $G''$ ) were decreased as the frequency declined indicating the progress of relaxation. Moreover, the linear relationship between  $G''$  and frequency reflected the typical feature of covalent crosslinking network. Interestingly, the  $G'$  of PAAm/CMC/PPy hydrogel containing PPy of 0.25% showed the maximum value consistent with tensile and compression conclusions. The  $G'$  of hydrogel depended on the content of PPy in that the addition of PPy could inhibit the monomer polymerization resulting in the improved viscosity.

### The conductivity of PAAm/CMC/PPy hydrogel

The conductivity of PAAm/CMC/PPy hydrogel sample (25 mm×4 mm) was measure by a two electrode system (Solartron 1260/1287 electrochemical workstation). The conductivity of hydrogel sample was calculated as following:

$$\sigma=L/RS$$

where  $L$ ,  $S$  and  $R$  was the length of hydrogel sample, the conductive area and resistance of hydrogel, respectively.

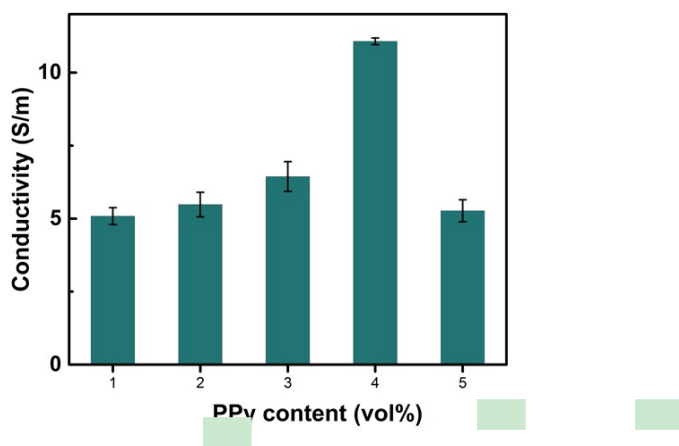

**Fig. S6** The electrical conductivity of hydrogel with various PPy contents.

The electronic conductivity of PAAm/CMC/PPy hydrogel with various PPy contents was analyzed. In **Fig. S6**, as the PPy content increased, the conductivity increased followly declined, and the maximum value attained 11.07 S/m.

**Table S1.** The recipes of the PAAm/CMC/PPy hydrogels.

| Hydrogel     | PPy<br>(vol%) | CMC<br>(wt%) | AAm<br>(g) | MBA<br>(wt% of<br>AAm) | KPS<br>(wt% of AAm) | TMEDA<br>(uL) |
|--------------|---------------|--------------|------------|------------------------|---------------------|---------------|
| PAAm/CMC/PPy | 0.10          | 0.75         | 4          | 1.5                    | 7.5                 | 10            |
|              | 0.25          | 0.75         | 4          | 1.5                    | 7.5                 | 10            |
|              | 0.50          | 0.75         | 4          | 1.5                    | 7.5                 | 10            |
|              | 1.00          | 0.75         | 4          | 1.5                    | 7.5                 | 10            |
|              | 1.25          | 0.75         | 4          | 1.5                    | 7.5                 | 10            |

**Table S2.** The conductivities, stresses and specific capacitances for recently reported conductive hydrogel.

| Name         | Conductivity<br>(S m <sup>-1</sup> ) | Stress               | Specific<br>capacitance                       | Reference |
|--------------|--------------------------------------|----------------------|-----------------------------------------------|-----------|
| Graphene     | 0.5                                  | 470 kPa(tensile)     | 160 Fg <sup>-1</sup> (1 A g <sup>-1</sup> )   | Ref. S1   |
| NCG/PPy      | 8                                    | 1.3 MPa(Compression) | -                                             | Ref. S2   |
| Graphene     | 3.2                                  | -                    | 187 Fg <sup>-1</sup> (1 A g <sup>-1</sup> )   | Ref. S3   |
| PEDOT/GO     | 73                                   | 1.6 MPa(Compression) | 174 Fg <sup>-1</sup> (5 mV s <sup>-1</sup> )  | Ref. S4   |
| PVP/PANI     | 0.05                                 | -                    | -                                             | Ref. S5   |
| PEDOT/PSS    | 0.043                                | 600 kPa(tensile)     | -                                             | Ref. S6   |
| PEDOT/PSS/Au | 0.02                                 | -                    | -                                             | Ref. S7   |
| PAAm/CMC/PPy | 11.0                                 | 38 kPa(tensile)      | 126 Fg <sup>-1</sup> (0.2 A g <sup>-1</sup> ) | This work |

## Reference

- S1 Y. Xu, K. Sheng, C. Li and G. Shi, *ACS Nano*, 2010, **4**, 4324–4330.
- S2 Z. Shi, H. Gao, J. Feng, B. Ding, X. Cao, S. Kuga, Y. Wang, L. Zhang and J. Cai, *Angew. Chem. Int. Ed.*, 2014, **53**, 5380–5384.
- S3 L. Zhang and G. Shi, *The Journal of Physical Chemistry C*, 2011, **7**.
- S4 H. Zhou, 2013, **8**.
- S5 C. Dispenza, C. L. Presti, C. Belfiore, G. Spadaro and S. Piazza, *Polymer*, 2006, **47**, 961–971.
- S6 S. Naficy, J. M. Razal, G. M. Spinks, G. G. Wallace and P. G. Whitten, *Chem. Mater.*, 2012, **24**, 3425–3433.
- S7 N.-R. Shin, S.-H. Choi and J.-Y. Kim, *Synthetic Metals*, 2014, **192**, 23–28.
